## Adaptation of the Person-Centered Maternity Care scale for people of color in the United States

### Authors:

Patience A. Afulani, PhD, MBChB<sup>a,b</sup>, Molly R. Altman, PhD, CNM<sup>c</sup>, Esperanza Castillo, MS<sup>b,d</sup>,  
Nayeli Bernal, MPH<sup>d</sup>, Linda Jones<sup>d</sup>, Tanefer Camara MHA<sup>d</sup>, Zoe Carrasco, RN<sup>d</sup>, Shanell  
Williams<sup>b,d</sup>, May Sudhinaraset PhD,<sup>e</sup> , Miriam Kuppermann, PhD, MPH<sup>a,b,d</sup>.

<sup>a</sup> Department of Epidemiology and Biostatistics, University of California

<sup>b</sup> Department of Obstetrics, Gynecology, & Reproductive Sciences, University of California, San  
Francisco

<sup>c</sup> Department of Child, Family, and Population Health Nursing, University of Washington

<sup>d</sup> California Preterm Birth Initiative, University of California, San Francisco

<sup>e</sup> Department of Community Health Science, University of California, Los Angeles

**Corresponding author:** Patience Afulani, PhD, MPH, MBChB, Department of Epidemiology and  
Biostatistics, University of California, San Francisco, 550 16th St, San Francisco, CA 94158,

[Patience.Afulani@ucsf.edu](mailto:Patience.Afulani@ucsf.edu)

**Funding Statement:** This work was supported in part by the University of California, San  
Francisco, California Preterm Birth Initiative, funded by Marc and Lynne Benioff. The funder had  
no role in the study design, data collection, analysis and interpretation of data; in the writing of  
the report; and in the decision to submit the article for publication.

**Acknowledgements:**

We would like to thank all members of the California Preterm Birth Initiative Community Advisory Board, everyone who provided feedback at various phases of the scale development, and all the people who participated in the numerous stages of the project. We are also grateful to everyone who helped with recruitment and other members of our research team (Nadia Diamond-Smith and Nicholas Rubashkin at the University of California, San Francisco).

**Data Access and Responsibility:** PA had full access to all the data in the study and takes responsibility for the integrity of the data and the accuracy of the data analysis.

**Disclosure Statement:** The authors report no conflict of interest.

**Keywords:** Person-centered care; maternity care, intrapartum care, birth; people of color; Black women; community-based participatory research; respectful maternity care; experience of care; quality of care; measurement

## **Abstract**

**Introduction:** Mistreatment by healthcare providers disproportionately affects people of color in the United States (US). The goal of this study is to adapt the global Person-Centered Maternity Care (PCMC) scale to the experiences of people of color in the US using a community-engaged approach.

**Methods:** We conducted expert reviews to improve content validity and cognitive interviews with potential respondents were conducted to assess relevance, comprehension, and comprehensiveness. Surveys of 297 postpartum people, 82% of whom identified as Black, were used for psychometric analysis in which we assessed construct and criterion validity and reliability. The University of California, San Francisco, California Preterm Birth Initiative's Community Advisory Board (CAB), which consists of community members, community-based health workers, and social service providers in Northern California, provided input during all stages of the project.

**Results:** Through an iterative process of factor analysis, discussions with the CAB, and a prioritization survey, we eliminated items that performed poorly in psychometric analysis, yielding a 35-item PCMC-US scale with sub-scales for "dignity and respect," "communication and autonomy," and "responsive and supportive care." The Cronbach's alpha for the full scale is 0.95 and for the sub-scales is 0.87. Standardized summative scores range from 0 to 100, with higher scores indicating higher PCMC. Correlations with related measures indicated high criterion validity.

**Conclusions:** The 35-item PCMC-US scale and its sub-scales have high validity and reliability in a

sample of predominantly Black women. This scale provides a tool to support efforts to reduce the disparities in birth outcomes among people of color.

## 1 INTRODUCTION

2 Disrespectful care and mistreatment by healthcare providers have been shown to  
3 disproportionately affect people of color in the United States (US), particularly Black pregnant  
4 and birthing people, and have been attributed to racism and discrimination (Alhusen et al.,  
5 2016; Altman et al., 2019; McLemore et al., 2018; Vedam, Stoll, Taiwo, et al., 2019).  
6 Hospitalizations for labor and delivery are often considered the apex for these experiences, not  
7 only because birth is a major life transition, but also due to exposure to unfamiliar providers  
8 and a culture of care that may or may not be aligned with patient expectations (Lyndon et al.,  
9 2018).

10 Person-centered care, or care that emphasizes the wants and needs of the patient over  
11 the provider, focuses on respect, trust, dignity, support, autonomy, and communication among  
12 other domains, and represents a major determinant of high-quality care provision (Institute of  
13 Medicine (US) Committee on Quality of Health Care in America, 2001; WHO, 2016). Various  
14 aspects of person-centered care during childbirth are affected by implicit bias and are often  
15 dependent on providers' assumptions regarding the ability of birthing people to make decisions  
16 about their care (Afulani, Ogolla, et al., 2021; Altman et al., 2019; Vedam, Stoll, McRae, et al.,  
17 2019).

18 While numerous qualitative studies have examined aspects of person-centered  
19 maternity care, very few have attempted to operationalize it quantitatively to enable  
20 measurement of the effectiveness of interventions aimed at improving quality of care, and, to  
21 our knowledge, none have looked at the unique experiences of Black pregnant and birthing  
22 people in the US (Nilvér et al., 2017). We sought to adapt and validate a scale to measure

23 person-centered care during labor and childbirth to reflect the experiences of people of color in  
24 the US, with an emphasis on the experiences of Black women and birthing people.

25

## 26 **MATERIALS AND METHODS**

27 The Person-Centered Maternity Care (PCMC) scale, which was initially developed for use in low-  
28 resource countries and has been validated in several contexts (Afulani et al., 2017, 2018;  
29 Afulani, Phillips, et al., 2019), served as the basis for this US-focused version. The original PCMC  
30 scale was first validated in Kenya and subsequently in India and Ghana (Afulani et al., 2018;  
31 Afulani, Phillips, et al., 2019; Afulani, Aborigo, et al., 2019). To adapt this scale for use in the US,  
32 we followed standard scale development procedures in addition to a community-engaged  
33 approach to ensure that it is valid, reliable, and fits the needs of Black birthing people and  
34 families (DeVellis, 2016; Hinkin et al., 1997). Specifically, a literature review was conducted to  
35 define the construct and identify domains and to develop the initial list of items (Afulani et al.,  
36 2017). We then adapted the scale using expert reviews, cognitive interviews, structured  
37 surveys, and psychometric analysis—engaging community members throughout the process—  
38 and named the adapted version the PCMC-US scale. We used a parallel process to develop a  
39 prenatal care-oriented measure, which we refer to as the Person-Centered Prenatal Care  
40 (PCPC) scale (Afulani, Altman, et al., 2021).

41 **Expert reviews:** The goal of the expert review was to optimize content validity in terms of  
42 relevance and comprehensiveness (DeVellis, 2016). Our research team, which included  
43 clinicians and researchers, first reviewed the 30 items in the original PCMC scale and removed  
44 items not applicable to the US setting (e.g., availability of water and electricity). We then held

45 an expert review session with 10 members of the University of California, San Francisco (UCSF),  
46 California Preterm Birth Initiative's (CA-PTBi) Community Advisory Board (CAB). The CAB  
47 includes people of color who have had preterm births, community-based health workers, and  
48 social service providers in Northern California. The CAB members represent community experts  
49 who understand what PCMC means to people of color because of their direct service and lived  
50 experiences in the communities of focus. A second expert review session consisted of 20  
51 people, including two community health workers, four CAB members, and 14 faculty members  
52 (researchers and clinicians). During these sessions, the remaining questions were reviewed, and  
53 several new questions were recommended that related to existing PCMC domains (Examples:  
54 "Did you feel heard and listened to?" "Did providers encourage you to ask questions?" "Did  
55 providers knock on your room's door and wait for response before entering?"). Questions on  
56 infant feeding choices and emotional well-being were also added. CAB members were paid  
57 \$40/hour for their participation in these sessions.

58 ***Cognitive interviews:*** We next conducted cognitive interviews to assess and improve  
59 comprehensibility, relevance, and comprehensiveness of the questions (Collins, 2003; Nápoles-  
60 Springer et al., 2006). We developed an interview guide that included questions on item  
61 wording, possible sources of confusion, and appropriateness of items, as well as whether  
62 questions were missing. We then conducted the cognitive interviews with 15 participants who  
63 were  $\geq 28$  weeks pregnant or had given birth within the past year. Participants were recruited  
64 from partner organizations and from a UCSF database of patients who had previously  
65 participated in studies and were interested in being contacted for future studies. Participants  
66 received a \$50 gift card for participation. Feedback from the cognitive interviews were used to

67 revise the items. We had 50 candidate items for the PCMC-US scale (Table 1) at the end of the  
68 cognitive interviews. These questions were then integrated into the study questionnaire that  
69 included items on sociodemographic characteristics and other issues. The questionnaire was  
70 piloted with eight people meeting eligibility criteria for the planned survey to assure  
71 acceptability and ease of completion.

72

73 ===Table 1 Full set of PCMC questions===

74

75 **Survey:** Participants for the survey were recruited through community-based organizations and  
76 targeted social media advertisements. Individuals aged 15 years or older who had given birth in  
77 the past year were eligible to participate, and recruitment materials indicated that the study  
78 was focused on the experiences of people of color. We conducted the survey between January  
79 and September 2020 using the REDCap (Research Electronic Database Capture) online survey  
80 platform for data collection (Harris et al., 2009). Individuals who were interested in joining the  
81 study emailed the study team, answered eligibility questions, and once confirmed as eligible,  
82 were emailed a personalized link to complete the survey. Study information was provided on  
83 the landing page and respondents clicked a button to indicate informed consent before the  
84 survey opened up. Participants received a \$40 electronic gift card upon completing the survey.  
85 Ethical approval was obtained from UCSF's Institutional Review Board.

86 **Psychometric analyses:** The goal of the psychometric analyses was to assess and improve  
87 construct and criterion validity and internal reliability of the scale (DeVellis, 2016; Hinkin et al.,  
88 1997). We examined the distributions of all the items and recoded some response options to



89 obtain a uniform scale. To ensure that all response options ranged from 0 to 3, we recoded  
90 items that had a “not applicable” category (4) to the upper middle category (2: most of the  
91 time). We also reverse-coded negative items so that all responses reflected a scale ranging from  
92 0 as the lowest level to 3 as the highest level. We then constructed a correlation matrix to  
93 examine the correlations among the items.

94 Construct validity was assessed using exploratory factor analysis (DeVellis, 2016; Hinkin  
95 et al., 1997). The Kaiser-Meyer-Olkin (KMO) measure was used to test suitability of the items  
96 for factor analysis. The decision on how many factors to retain was made using Kaiser’s rule of  
97 retaining only factors with eigenvalues  $\geq 1$ , and examining the “elbow” of the scree plot (plot of  
98 eigenvalues) (Afifi et al., 2004; DeVellis, 2016; Hinkin et al., 1997). Oblique rotation, which  
99 allows for correlation between the rotated factors, was used because the person-centered care  
100 domains are theoretically related (Afifi et al., 2004; Hinkin et al., 1997). We used initial criteria  
101 of factor loadings  $\geq 0.3$  and uniqueness of  $\leq 0.8$  in iterative factor analysis, combined with  
102 feedback from the CAB to determine which items to retain or exclude (Afifi et al., 2004). Sub-  
103 scales were generated using the loading of the items on the extracted factors and conceptual  
104 groupings, and the items were summed to generate the PCMC-US scale and sub-scale scores.

105 Internal consistency reliability was assessed using Cronbach’s alpha (DeVellis, 2016;  
106 Hinkin et al., 1997). To assess criterion validity, we examined whether scales and sub-scales  
107 were associated with theoretically related measures (DeVellis, 2016). For example, we  
108 hypothesized that the PCMC-US scale would be associated with satisfaction and perceptions of  
109 the quality of intrapartum care received, and whether the participant would use the same  
110 service in the future (Afulani et al., 2017; Sheferaw et al., 2016). We also examined the

111 association between the PCMC-US scale and two other measures which assess women's  
112 combined experiences during pregnancy and childbirth: the Mothers Autonomy in Decision  
113 Making scale (MADM) and the Mothers on Respect Index (MORi) index (Vedam, Stoll, Martin, et  
114 al., 2017; Vedam, Stoll, Rubashkin, et al., 2017). We tested our hypotheses through correlations  
115 and bivariate linear and logistic regression analysis. STATA version 15 was used for all analyses.

116

## 117 **RESULTS**

118 In all, 312 participants completed the study. Fifteen participants who did not respond to all the  
119 PCMC-US items were excluded, resulting in an analytic sample of 297. Most respondents  
120 identified as Black (82%). The average age was 29 years old (SD=3.6), and most participants  
121 were married (89%), primiparous (76%), and college graduates (52%; Table 2).

122

123 =====Table 2: Sociodemographic and clinical characteristics=====

124

125 The distributions of the 50 individual PCMC-US items are in Appendix A. With few  
126 exceptions, the responses ranged between 0 and 3. The proportion of N/A responses on items  
127 that generated N/A responses ranged from 1 to 13% except for the question regarding whether  
128 providers explained medications, for which 54% responded that they did not receive any  
129 medicine. There was good correlation between most items, which generally ranged from 0.2 to  
130 0.7. Items that had correlations of <0.2 or negative correlations with other items were flagged.  
131 These included the question on preferred name, preferred language, position of choice, being  
132 separated from the baby, support for feeding goals, cleanliness, coercion, holding back from

133 asking questions, and crowding.

134 The KMO measures of sampling adequacy for all items ranged from 0.69 to 0.97, with an  
135 overall KMO of 0.94, indicating suitability for factor analysis. The initial factor analysis with all  
136 50 items yielded 6 factors with eigenvalues of  $\geq 1$ , accounting for 84% of the cumulative  
137 variance. However, there was one dominant factor (Figure 1) with an eigenvalue of 16.8, which  
138 accounted for 60% of cumulative variance. The eigenvalues for the other factors were  $< 2$   
139 (range: 1.0 to 1.6). All the items had a factor loading of  $\geq 0.3$  on at least one of the 6 factors  
140 except the questions on introduction, language, informed about what was happening, and  
141 support for feeding goals, which had loadings of between 0.2 and 0.3. Uniqueness for all items  
142 was  $< 0.8$  except for introduction, separation, language, holding back from asking questions, and  
143 crowding, which had uniqueness between 0.8 and 0.9. When the analysis was restricted to the  
144 single factor structure, all items had loadings of  $> 0.3$  except the items on name, separation,  
145 explained medications, coercion, holding back from asking questions, and crowding, which had  
146 loadings of  $< 0.2$  and uniqueness  $> 0.9$ . We conducted iterative factor analysis dropping different  
147 items and examining the results. Given the need for a parsimonious scale, we also identified  
148 items that were conceptually similar for possible elimination.

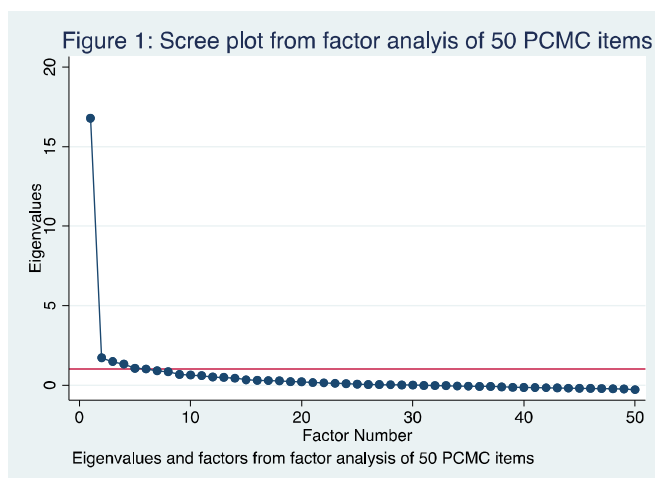

149

150           We presented the initial findings to the CAB and suggested dropping the items that had  
151 low loadings, high uniqueness, or conceptual difference/similarity. Although some CAB  
152 members acknowledged 50 items were too many for a scale, many strongly felt that all  
153 questions were important and should be included, so we could not achieve consensus on items  
154 to drop. Thus, to enable us to get to a smaller subset of questions, we used the results of the  
155 factor analysis, as well as conceptual domains based on the World Health Organization  
156 experience of care domains (Tunçalp et al., 2015), to group the 50 items into three domains for  
157 “Dignity and Respect” (DR: 11 items), “Communication and Autonomy” (CA: 19 items), and  
158 “Responsive and Supportive Care” (RS: 20 items) We then created a survey, grouping  
159 conceptually similar items together, and asked CAB members as well as research team  
160 members to select their top 8 to 10 questions from each domain.

161           The results of this survey (completed by 14 people and shown in Appendix B) were  
162 combined with the factor analysis to select items for the scale. We first decided to drop all  
163 items selected by less than a third of respondents (<5), as this suggested low priority, resulting  
164 in the elimination of 13 items (4 from CA, 1 from DR, and 8 from RS). We then re-ran the factor  
165 analysis on the remaining 37 items. All but three items had loadings >0.3 on the single factor for  
166 each domain and on the full scale (coercion, called by preferred name, and being separated  
167 from baby). Since the items on preferred name and being separated from baby were not highly  
168 ranked in the survey (selected by only 5 people), we decided to drop these two items next, but  
169 retained the coercion item despite its low loading because it was recommended by most  
170 respondents (9) and was one of the items CAB members felt strongly about retaining. Of note,  
171 despite reporting a generally good experience, about 30% of participants in this sample

172 reported being pressured into a decision by their providers, pointing to the importance of this  
173 item. This yielded a 35-item scale with 3 factors (Figure 2). All items had loadings >0.3 on the  
174 full scale and on the single factor for each domain, except the item on coercion (Table 3).  
175 Dropping the coercion item yielded a 34-item version in which all had loadings >0.3 on the full  
176 scale and on the single factor for each domain. Inclusion of the coercion item, however, did not  
177 significantly change the loadings of the other items or the Cronbach's alpha (which was 0.95 in  
178 both cases). So the 35-item version was maintained with 14, 10, and 11 items respectively for  
179 the CA, DR, and RS sub-scales. The Cronbach's alpha for all the sub-scales is 0.87 (Table 4).

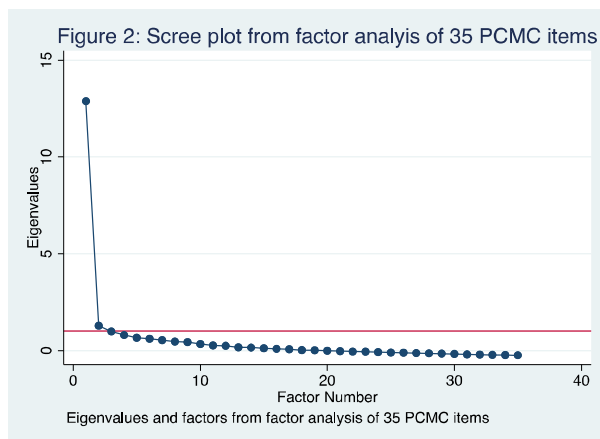

180  
181 =====Table 3 Factor analysis results=====

182 To create summative scores for the full scale and sub-scales, the responses on the items  
183 for each are added. These scores are then standardized by dividing the mean score by the  
184 maximum possible scores ((e.g., 105 (35\*3) for full scale, 42(14\*3) for CA, 30(10\*3) for DR, and  
185 33(11\*3) for RS)) and multiplying by 100. The standardized scores thus range from 0 to 100 for  
186 all the scores, where 0 is the worst PCMC and 100 is the best PCMC one can receive. The raw  
187 and standardized scores are shown in Table 4. The results show an average standardized PCMC  
188 score of 89. The highest sub-scale score is for Dignity and Respect (92) and the lowest score is

189 for Communication and Autonomy (87).

190 ===Table 4: Scale Properties===

191 The associations between the full PCMC-US scale and sub-scales and the related  
192 measures provided support for criterion validity. The regression of each of the sub-scales and  
193 the full scale on participants' ratings of satisfaction with services, general quality ratings, and  
194 whether they would give birth in the same facility if they were to become pregnant again shows  
195 increasing PCMC is associated with higher odds of satisfaction and quality of care and intent to  
196 give birth in the same facility in the future (Table 5). The correlation coefficients between the  
197 PCMC-US scale and sub-scale scores and the MORi and MADM scale scores are all >0.5, with a  
198 correlation coefficient of 0.69 for CA and MADM and 0.63 for DR and MORi.

199

200 ===Table 5: Criterion validity results ===

201

## 202 **DISCUSSION**

203 We used a rigorous, community-engaged approach to adapt the Person-Centered Maternity  
204 Care scale to reflect the experiences of people of color in the US. Through expert reviews and  
205 cognitive interviews, we developed 50-items that capture person-centered maternity care for  
206 women of color. We then used psychometric analysis and feedback from the CAB to reduce the  
207 items to a 35-item PCMC-US scale, which has three sub-scales measuring dignity and respect,  
208 communication and autonomy, and responsive and supportive care. The full scale and the sub-  
209 scales have good content, construct, and criterion validity with Cronbach's alphas of 0.95 for  
210 the main scale and >0.8 for the sub-scales.

211 The final version of the PCMC-US scale ended up being similar to the original version  
212 (Afulani et al., 2017, 2018), with some subtle differences. Both versions have similar sub-scales,  
213 given the similar set of items and conceptual groupings using the WHO experience of care  
214 domains (Tunçalp et al., 2015). Although the wording of the questions resemble the original  
215 questions, the adaption process ensured that the exact wording of items in the new version are  
216 appropriate for the US context. The response options used in the original PCMC scale were  
217 maintained, as participants in the cognitive interviews found the frequency response format to  
218 be easy to respond to and did not think it should be changed. This response format leads to  
219 more variability in responses than binary yes/no responses. Acquiescence bias is also less of an  
220 issue than the agree/disagree format used in other scales (Holbrook, 2008).

221 The original PCMC scale has 30 items, compared to 35 items in the PCMC-US scale. This is  
222 due to several questions that were added during the adaptation process, leading to a set of 50  
223 potential items, all of which were felt to be highly relevant by the cognitive interview  
224 participants and the CAB. The 35 items included in the PCMC-US scale are the result of our  
225 attempt to produce a parsimonious but comprehensive scale that incorporates feedback from  
226 the CAB and has high validity and reliability. Thus, although we excluded 15 items from the  
227 scale, these items could be included in surveys that are able to include a longer list of  
228 questions. In addition, we included the question on coercion despite its poor performance in  
229 factor analysis because of its importance to the experiences of women of color. The  
230 performance of this item should be reassessed in future studies.

231 The PCMC-US scale is different from other scales for measuring birthing people's  
232 experience. First, to our knowledge it is the first available, validated person-centered care scale

233 that centers the childbirth experiences of Black birthing people. Continuous engagement with  
234 members of the priority community ensured that the items in the scale capture their unique  
235 experiences (Altman et al., 2019, 2020; McLemore et al., 2018). The scale items were  
236 intentionally developed to include a mix of subjective questions to capture people’s subjective  
237 perceptions as well as more objective and actionable items that can inform quality  
238 improvement (Afulani, Aborigo, et al., 2019; Montagu et al., 2020). The PCMC-US scale is also  
239 among the few tools that measure experiences of person-centered care during childbirth in a  
240 comprehensive manner (Nilvér et al., 2017).

#### 241 **Strengths and Limitations**

242 A key strength of this study is the use of a community-based participatory approach embedded  
243 in standard instrument development methods. This helped ensure that the PCMC-US scale is  
244 relevant to people of color—particularly the Black community. Starting with a validated tool  
245 also provided a rigorous, theory-based foundation for the adaptation. A potential limitation is  
246 generalizability, given the relatively highly educated validation sample. This, however, is also a  
247 strength of the study, as it represents the views of a diverse group of Black people. Another  
248 limitation is the low representation of non-Black persons of color, which is likely because the  
249 survey was only administered in English. Plans for validation in a Spanish-speaking population  
250 are in place. The similarities between the original PCMC scale and the US version suggests that  
251 the scale may be applicable across different populations. Validations in new populations are  
252 however needed. Respondent burden due to the length of the scale may be a limitation.  
253 However, given the multidimensional nature of person-centered maternity care, the  
254 assessment of the relevance of the items included, and their psychometric performance, this is



255 the most parsimonious version of the scale we are able to recommend at this time. The sub-  
256 scales can be used individually where necessary, but we recommend measuring all three  
257 domains to assess PCMC in a holistic manner: It takes about 10 minutes to answer all the  
258 questions. Shorter versions will be developed in future studies when data from more diverse  
259 samples are available, as was done for the low resource setting version (Afulani, Feeser, et al.,  
260 2019).

261

### 262 **Implications for Practice and/or Policy**

263 Given the increasing documentation of the poor experience of people of color in health care  
264 settings, it is important that these experiences are documented in a systematic manner. In  
265 addition, there is the need to develop and evaluate interventions to improve the experiences of  
266 people of color in health care settings including during childbirth. These efforts require  
267 measures that center the experiences of the affected communities (K. Scott, 2019). The PCMC-  
268 US scale, together with ongoing efforts to measure obstetric racism (K. A. Scott & Davis, 2021),  
269 provide tools for these purposes.

270

### 271 **Conclusions**

272 Using a community-engaged process, we adapted the PCMC scale that was initially developed  
273 in Kenya and India to make it relevant to the experiences of people of color in the US. The  
274 PCMC-US scale has high validity and reliability in a sample of predominantly black women. The  
275 scale will help drive as well as serve as an accountability tool in efforts to reduce disparities in  
276 pregnancy and birth outcomes.

277 **REFERENCES**

- 278 Afifi, A. A., Clark, V., & May, S. (2004). Principal components analysis: Chapter 14. In *Computer-*  
279 *Aided Multivariate Analysis* (4th ed.). CRC Press.
- 280 Afulani, P. A., Aborigo, R. A., Walker, D., Moyer, C. A., Cohen, S., & Williams, J. (2019). Can an  
281 integrated obstetric emergency simulation training improve respectful maternity care?  
282 Results from a pilot study in Ghana. *Birth (Berkeley, Calif.)*.  
283 <https://doi.org/10.1111/birt.12418>
- 284 Afulani, P. A., Altman, M. R., Castillo, E., Bernal, N., Jones, L., Camara, T., Carrasco, Z., Williams,  
285 S., Sudhinaraset, M., & Kuppermann, M. (2021). Development of the Person-Centered  
286 Prenatal Care scale for People of Color. *American Journal of Obstetrics & Gynecology*,  
287 *0*(0). <https://doi.org/10.1016/j.ajog.2021.04.216>
- 288 Afulani, P. A., Diamond-Smith, N., Golub, G., & Sudhinaraset, M. (2017). Development of a tool  
289 to measure person-centered maternity care in developing settings: Validation in a rural  
290 and urban Kenyan population. *Reproductive Health*, *14*.  
291 <https://doi.org/10.1186/s12978-017-0381-7>
- 292 Afulani, P. A., Diamond-Smith, N., Phillips, B., Singhal, S., & Sudhinaraset, M. (2018). Validation  
293 of the person-centered maternity care scale in India. *Reproductive Health*, *15*(1), 147.  
294 <https://doi.org/10.1186/s12978-018-0591-7>
- 295 Afulani, P. A., Feeser, K., Sudhinaraset, M., Aborigo, R., Montagu, D., & Chakraborty, N. (2019).  
296 Toward the development of a short multi-country person-centered maternity care scale.  
297 *International Journal of Gynecology & Obstetrics*, *0*(0).  
298 <https://doi.org/10.1002/ijgo.12827>

- 299 Afulani, P. A., Ogolla, B. A., Oboke, E. N., Onger, L., Weiss, S. J., Lyndon, A., & Mendes, W. B.  
300 (2021). Understanding disparities in person-centred maternity care: The potential role  
301 of provider implicit and explicit bias. *Health Policy and Planning*, *caa190*.  
302 <https://doi.org/10.1093/heapol/caa190>
- 303 Afulani, P. A., Phillips, B., Aborigo, R. A., & Moyer, C. A. (2019). Person-centred maternity care in  
304 low-income and middle-income countries: Analysis of data from Kenya, Ghana, and  
305 India. *The Lancet. Global Health*, *7*(1), e96–e109. [https://doi.org/10.1016/S2214-](https://doi.org/10.1016/S2214-109X(18)30403-0)  
306 [109X\(18\)30403-0](https://doi.org/10.1016/S2214-109X(18)30403-0)
- 307 Alhusen, J. L., Bower, K. M., Epstein, E., & Sharps, P. (2016). Racial Discrimination and Adverse  
308 Birth Outcomes: An Integrative Review. *Journal of Midwifery & Women's Health*, *61*(6),  
309 707–720. <https://doi.org/10.1111/jmwh.12490>
- 310 Altman, M. R., McLemore, M. R., Oseguera, T., Lyndon, A., & Franck, L. S. (2020). Listening to  
311 Women: Recommendations from Women of Color to Improve Experiences in Pregnancy  
312 and Birth Care. *Journal of Midwifery & Women's Health*, *n/a*(*n/a*).  
313 <https://doi.org/10.1111/jmwh.13102>
- 314 Altman, M. R., Oseguera, T., McLemore, M. R., Kantrowitz-Gordon, I., Franck, L. S., & Lyndon, A.  
315 (2019). Information and power: Women of color's experiences interacting with health  
316 care providers in pregnancy and birth. *Social Science & Medicine*, *238*, 112491.  
317 <https://doi.org/10.1016/j.socscimed.2019.112491>
- 318 Collins, D. (2003). Pretesting survey instruments: An overview of cognitive methods. *Quality of*  
319 *Life Research: An International Journal of Quality of Life Aspects of Treatment, Care and*  
320 *Rehabilitation*, *12*(3), 229–238.

- 321 DeVellis, R. F. (2016). *Scale Development: Theory and Applications* (4 edition). SAGE  
322 Publications, Inc.
- 323 Harris, P. A., Taylor, R., Thielke, R., Payne, J., Gonzalez, N., & Conde, J. G. (2009). Research  
324 Electronic Data Capture (REDCap)—A metadata-driven methodology and workflow  
325 process for providing translational research informatics support. *Journal of Biomedical*  
326 *Informatics*, 42(2), 377–381. <https://doi.org/10.1016/j.jbi.2008.08.010>
- 327 Hinkin, T., Tracey, J., & Enz, C. (1997). Scale Construction: Developing Reliable and Valid  
328 Measurement Instruments. *Articles and Chapters*.  
329 <http://scholarship.sha.cornell.edu/articles/613>
- 330 Holbrook, A. (2008). Acquiescence Response Bias. In P. Lavrakas, *Encyclopedia of Survey*  
331 *Research Methods*. Sage Publications, Inc. <https://doi.org/10.4135/9781412963947.n3>
- 332 Institute of Medicine (US) Committee on Quality of Health Care in America. (2001). *Crossing the*  
333 *Quality Chasm: A New Health System for the 21st Century*. National Academies Press  
334 (US). <http://www.ncbi.nlm.nih.gov/books/NBK222274/>
- 335 Lyndon, A., Malana, J., Hedli, L. C., Sherman, J., & Lee, H. C. (2018). Thematic Analysis of  
336 Women’s Perspectives on the Meaning of Safety During Hospital-Based Birth. *Journal of*  
337 *Obstetric, Gynecologic, and Neonatal Nursing: JOGNN*, 47(3), 324–332.  
338 <https://doi.org/10.1016/j.jogn.2018.02.008>
- 339 McLemore, M. R., Altman, M. R., Cooper, N., Williams, S., Rand, L., & Franck, L. (2018). Health  
340 care experiences of pregnant, birthing and postnatal women of color at risk for preterm  
341 birth. *Social Science & Medicine* (1982), 201, 127–135.  
342 <https://doi.org/10.1016/j.socscimed.2018.02.013>

- 343 Montagu, D., Giessler, K., Nakphong, M. K., Roy, K. P., Sahu, A. B., Sharma, K., Green, C., &  
344 Sudhinaraset, M. (2020). Results of a person-centered maternal health quality  
345 improvement intervention in Uttar Pradesh, India. *PLOS ONE*, *15*(12), e0242909.  
346 <https://doi.org/10.1371/journal.pone.0242909>
- 347 Nápoles-Springer, A. M., Santoyo-Olsson, J., O'Brien, H., & Stewart, A. L. (2006). Using cognitive  
348 interviews to develop surveys in diverse populations. *Medical Care*, *44*(11 Suppl 3), S21-  
349 30. <https://doi.org/10.1097/01.mlr.0000245425.65905.1d>
- 350 Nilvér, H., Begley, C., & Berg, M. (2017). Measuring women's childbirth experiences: A  
351 systematic review for identification and analysis of validated instruments. *BMC*  
352 *Pregnancy and Childbirth*, *17*(1), 203. <https://doi.org/10.1186/s12884-017-1356-y>
- 353 Scott, K. (2019). *Redesigning Perinatal Quality Improvement: Community Driven Measures,*  
354 *Meanings, and Methods*. Brooklyn Grows.  
355 [https://www.brooklyngrows.com/blog/2019/11/3/redesigning-perinatal-quality-](https://www.brooklyngrows.com/blog/2019/11/3/redesigning-perinatal-quality-improvement-community-driven-measures-meanings-and-methods)  
356 [improvement-community-driven-measures-meanings-and-methods](https://www.brooklyngrows.com/blog/2019/11/3/redesigning-perinatal-quality-improvement-community-driven-measures-meanings-and-methods)
- 357 Scott, K. A., & Davis, D.-A. (2021). Obstetric Racism: Naming and Identifying a Way Out of Black  
358 Women's Adverse Medical Experiences. *American Anthropologist*, *00*(00), 1–4.  
359 <https://doi.org/10.1111/aman.13559>
- 360 Sheferaw, E. D., Mengesha, T. Z., & Wase, S. B. (2016). Development of a tool to measure  
361 women's perception of respectful maternity care in public health facilities. *BMC*  
362 *Pregnancy and Childbirth*, *16*, 67. <https://doi.org/10.1186/s12884-016-0848-5>
- 363 Tunçalp, B., Were, W., MacLennan, C., Oladapo, O., Gülmezoglu, A., Bahl, R., Daelmans, B.,  
364 Mathai, M., Say, L., Kristensen, F., Temmerman, M., & Bustreo, F. (2015). Quality of care

365 for pregnant women and newborns—The WHO vision. *BJOG: An International Journal of*  
366 *Obstetrics & Gynaecology*, 122(8), 1045–1049. [https://doi.org/10.1111/1471-](https://doi.org/10.1111/1471-0528.13451)  
367 0528.13451

368 Vedam, S., Stoll, K., Martin, K., Rubashkin, N., Partridge, S., Thordarson, D., Jolicoeur, G., &  
369 Changing Childbirth in BC Steering Council. (2017). The Mother’s Autonomy in Decision  
370 Making (MADM) scale: Patient-led development and psychometric testing of a new  
371 instrument to evaluate experience of maternity care. *PloS One*, 12(2), e0171804.  
372 <https://doi.org/10.1371/journal.pone.0171804>

373 Vedam, S., Stoll, K., McRae, D. N., Korchinski, M., Velasquez, R., Wang, J., Partridge, S., McRae,  
374 L., Martin, R. E., & Jolicoeur, G. (2019). Patient-led decision making: Measuring  
375 autonomy and respect in Canadian maternity care. *Patient Education and Counseling*,  
376 102(3), 586–594. <https://doi.org/10.1016/j.pec.2018.10.023>

377 Vedam, S., Stoll, K., Rubashkin, N., Martin, K., Miller-Vedam, Z., Hayes-Klein, H., & Jolicoeur, G.  
378 (2017). The Mothers on Respect (MOR) index: Measuring quality, safety, and human  
379 rights in childbirth. *SSM - Population Health*, 3, 201–210.  
380 <https://doi.org/10.1016/j.ssmph.2017.01.005>

381 Vedam, S., Stoll, K., Taiwo, T. K., Rubashkin, N., Cheyney, M., Strauss, N., McLemore, M.,  
382 Cadena, M., Nethery, E., Rushton, E., Schummers, L., Declercq, E., & GVtM-US Steering  
383 Council. (2019). The Giving Voice to Mothers study: Inequity and mistreatment during  
384 pregnancy and childbirth in the United States. *Reproductive Health*, 16(1), 77.  
385 <https://doi.org/10.1186/s12978-019-0729-2>

386 WHO. (2016). *Standards for improving quality of maternal and newborn care in health facilities*.

387 [http://www.who.int/maternal\\_child\\_adolescent/documents/improving-maternal-](http://www.who.int/maternal_child_adolescent/documents/improving-maternal-)

388 [newborn-care-quality/en/](http://www.who.int/maternal_child_adolescent/documents/improving-maternal-newborn-care-quality/en/)

389

390

**Table 1: Person-Centered Maternity Care (PCMC) questions**

| <i>No.</i> | <i>Question in original PCMC scale</i>                                                                                                                       | <i>Final question in PCMC-US scale<sup>1</sup></i>                                                                             | <i>Label</i>             |
|------------|--------------------------------------------------------------------------------------------------------------------------------------------------------------|--------------------------------------------------------------------------------------------------------------------------------|--------------------------|
| 1.         | How did you feel about the amount of time you waited? Would you say it was very short, somewhat short, somewhat long, or very long?                          | How did you feel about the amount of time you had to wait before being examined by a health care provider (doctor or midwife)? | Wait time                |
| 2.         |                                                                                                                                                              | How did you feel about the amount of time you had to wait in triage before being seen and assessed?                            | Triage time              |
| 3.         | During your time in the health facility did the doctors, nurses, or other health care providers introduce themselves to you when they first came to see you? | Did each new provider introduce themselves to you when they first came to see you?                                             | Introduction             |
| 4.         | Did the doctors, nurses, or other health care providers call you by your name?                                                                               | Did your providers call you by your preferred name?                                                                            | Preferred name           |
| 5.         | Did the doctors, nurses, or other staff at the facility treat you with respect?                                                                              | Did your providers treat you with respect?                                                                                     | Treated with respect     |
| 6.         |                                                                                                                                                              | Did you feel your experience and knowledge were valued?                                                                        | Experience valued        |
| 7.         |                                                                                                                                                              | Did you feel your customs and culture were respected by your providers?                                                        | Customs respected        |
| 8.         |                                                                                                                                                              | Did you feel heard and listened to by your providers?                                                                          | Felt heard               |
| 9.         |                                                                                                                                                              | Did providers knock on your room's door and wait for response before entering?                                                 | Privacy-knock on door    |
| 10.        | During examinations in the labor room, were you covered up with a cloth or blanket or screened with a curtain so that you did not feel exposed?              | During exams, were you covered up with a cloth or blanket or screened with a curtain so that you did not feel exposed?         | Privacy-covered          |
| 11.        | Do you feel like your health information was or will be kept confidential at this facility?                                                                  | Did you feel your health information was kept confidential and private by providers and staff?                                 | Information confidential |
| 12.        | Did you feel like the doctors, nurses or other staff at the facility involved you in decisions about your care?                                              | Did your providers involve you in decisions about your care?                                                                   | Involved in decisions    |
| 13.        |                                                                                                                                                              | Did you feel coerced or pressured into a decision by providers?                                                                | Coercion                 |
| 14.        | Did the doctors and nurses explain to you why they were doing examinations or procedures on you?                                                             | Did your providers explain to you why they were doing examinations or procedures on you?                                       | Explain procedures       |
| 15.        |                                                                                                                                                              | Did your providers explain to you why they were doing examinations or procedures on your baby?                                 | Explain baby procedures  |
| 16.        | Did the doctors and nurses explain to you why they were giving you any medicine?                                                                             | Did your providers explain to you why they were giving you any medicine?                                                       | Explain medication       |



|     |                                                                                                                                     |                                                                                                                                   |                                   |
|-----|-------------------------------------------------------------------------------------------------------------------------------------|-----------------------------------------------------------------------------------------------------------------------------------|-----------------------------------|
| 17. | Did the doctors, nurses or other staff at the facility ask your permission/consent before doing procedures and examinations on you? | Did providers or other staff ask your permission/consent before touching or doing procedures or examinations on you?              | Consent                           |
| 18. |                                                                                                                                     | Did you feel your birth plan or preferences were respected? (i.e. moving during labor, pain management, music, birthing position) | Birth preferences respected       |
| 19. | During the delivery, do you feel like you were able to be in the position of your choice?                                           | Were you able to give birth in the position of your choice?                                                                       | Birth position of choice          |
| 20. | Were you allowed to eat or drink when you were hungry/thirsty?                                                                      | Were you able to eat and drink if desired?                                                                                        | Eat                               |
| 21. | Did the doctors, nurses or other staff at the facility speak to you in a language you could understand?                             | Did your providers speak to you using language or words you could understand?                                                     | Language understood               |
| 22. |                                                                                                                                     | Did you feel informed about what was happening to you during your childbirth?                                                     | Felt informed                     |
| 23. | Did the doctors and nurses at the facility talk to you about how you were feeling?                                                  | Did your providers ask about your emotional well-being?                                                                           | Emotional well-being              |
| 24. |                                                                                                                                     | Did your providers provide you with resources to help with your emotional well-being if you needed it?                            | Resources for emotional wellbeing |
| 25. | Did you feel you could ask the doctors, nurses or other staff at the facility any questions you had?                                | Did you feel you could ask your providers any questions you had?                                                                  | Could ask questions               |
| 26. |                                                                                                                                     | Did you hold back on asking questions for any reason?                                                                             | Hold back on asking questions     |
| 27. |                                                                                                                                     | Did providers encourage you to ask questions?                                                                                     | Encourage you to ask questions    |
| 28. |                                                                                                                                     | Did providers check that you understood information that was given to you?                                                        | Checked understanding             |
| 29. |                                                                                                                                     | Do you feel your questions were answered when you did ask?                                                                        | Questions were answered           |
| 30. | Did the doctors, nurses, and other staff at the facility show they cared for you?                                                   | Did providers give you information in a way that showed they cared about you?                                                     | Information showed they cared     |
| 31. |                                                                                                                                     | Did providers respect your family or companions who were with you?                                                                | Family respected                  |
| 32. | Were you allowed to have someone you wanted to stay with you during delivery?                                                       | Were you allowed to have everyone you wanted (e.g. doula, elder, friends, or family) stay with you during your childbirth?        | Companionship                     |
| 33. | When you needed help, did you feel the doctors, nurses or other staff at the facility paid attention?                               | Did you feel your providers responded in a timely manner when you requested assistance?                                           | Timely response                   |
| 34. | Did the doctors and nurses ask how much pain you were in?                                                                           | Did you feel your providers believed you when you said you were in pain?                                                          | Believed about pain               |

|     |                                                                                                                                                                                                                                                                              |                                                                                                                                                                                                                                                                   |                               |
|-----|------------------------------------------------------------------------------------------------------------------------------------------------------------------------------------------------------------------------------------------------------------------------------|-------------------------------------------------------------------------------------------------------------------------------------------------------------------------------------------------------------------------------------------------------------------|-------------------------------|
| 35. | Do you feel the doctors or nurses did everything they could to help control your pain?                                                                                                                                                                                       | Do you feel your providers did everything they could to help you manage your pain?                                                                                                                                                                                | Pain management               |
| 36. |                                                                                                                                                                                                                                                                              | Did you feel your providers avoided, ignored, or otherwise neglected you?                                                                                                                                                                                         | Neglected                     |
| 37. | Did you feel the doctors, nurses, or other health providers shouted at you, scolded, insulted, threatened, or talked to you rudely?                                                                                                                                          | Did you feel your providers shouted at you, scolded, insulted, threatened, or talked to you rudely?                                                                                                                                                               | Verbal abuse                  |
| 38. | Did you feel like you were treated roughly like pushed, beaten, slapped, pinched, physically restrained, or gagged?                                                                                                                                                          | Did you feel like your providers handled you roughly, held you down, or physically restrained you?                                                                                                                                                                | Physical abuse                |
| 39. | Did you feel the doctors, nurses or other staff at the facility took the best care of you?                                                                                                                                                                                   | Did you feel your providers took the best care of you?                                                                                                                                                                                                            | Took best care                |
| 40. | Did you feel you could completely trust the doctors, nurses or other staff at the facility with regards to your care?                                                                                                                                                        | Did you feel you could completely trust your providers with regards to your care?                                                                                                                                                                                 | Trust                         |
| 41. | During your time in the health facility, would you say you were treated differently because of any personal attribute... like your age, marital status, number of children, your education, wealth, your connections with the facility, or something like that? <sup>3</sup> | Would you say you were discriminated against because of your race, ethnicity, culture, sex, gender, sexual orientation, language, immigration status, religion, income, education, age, marital status, number of children, insurance status, or other attribute? | Discrimination                |
| 42. |                                                                                                                                                                                                                                                                              | Were you separated from your baby at any time after the birth?                                                                                                                                                                                                    | Separated from baby           |
| 43. |                                                                                                                                                                                                                                                                              | Was your feeding choice for your baby (breastfeeding, bottle feeding, both) respected by providers?                                                                                                                                                               | Baby feeding choice respected |
| 44. |                                                                                                                                                                                                                                                                              | Did you receive the support you needed to reach your baby's feeding goals? (i.e. lactation support)                                                                                                                                                               | Support for baby feeding      |
| 45. |                                                                                                                                                                                                                                                                              | Were you supported in creating a birth environment that made you feel comfortable?                                                                                                                                                                                | Comfortable birth environment |
| 46. |                                                                                                                                                                                                                                                                              | Do you think the place you gave birth met your needs?                                                                                                                                                                                                             | Needs met                     |
| 47. | Thinking about the wards, washrooms and the general environment of the health facility, will you say the facility was very clean, clean, dirty, or very dirty?                                                                                                               | Thinking about the place where you gave birth, did you feel that the rooms and facilities were clean?                                                                                                                                                             | Clean rooms                   |
| 48. | Thinking about the labor and postnatal wards, Did you feel the health facility was crowded?                                                                                                                                                                                  | Did you feel the place you gave birth was crowded during your birth stay? (i.e. not enough beds, moved from room to room, being in triage a long time)                                                                                                            | Crowded                       |
| 49. | In general, did you feel safe in the health facility?                                                                                                                                                                                                                        | In general, did you feel physically safe in or around your place of birth?                                                                                                                                                                                        | Felt safe                     |
| 50. |                                                                                                                                                                                                                                                                              | Did you feel you had access to your preferred place of birth?                                                                                                                                                                                                     | Preferred clinic              |

Notes:

<sup>1</sup> All questions have responses options 0. No, never; 1. Yes, a few times; 2. Yes, most of the time; 3. Yes, all the time.

Except the following:

Wait time and triage time options: 0. It was just right; 1. It was somewhat long; 2. It was very long; 3. It was extremely long

Introduction options: 0. No, none of them; 1. Yes, a few of them; 2. Yes, most of them; 3. Yes, all of them

Neglect, verbal, and physical abuse options: 0. No, never; 1. Yes, once; 2. Yes, a few times; 3. Yes, many times

<sup>2</sup> Blank implies not part of original scale and added as part of adaptation process.

<sup>3</sup> Fell out after factor analysis of original scale.

<sup>4</sup> Questions in original PCMC scale excluded from PCMC-US scale include:

Was there water in the facility?

Was there electricity in the facility?

Did the doctors, nurses, and other staff at the facility treat you in a friendly manner?

Did the doctors, nurses or other staff at the facility support your anxieties and fears?

Do you think there was enough health staff in the facility to care for you?

“Were you allowed to have someone you wanted to stay with you during labor?” and “[w]ere you allowed to have someone you wanted to stay with you during the delivery?” were combined into one question

**Table 2: Characteristics of respondents (N=297)**

|                                     | No. | %    |
|-------------------------------------|-----|------|
| <b>Race/ethnicity</b>               |     |      |
| Black/African American              | 242 | 81.5 |
| White/Caucasian                     | 33  | 11.1 |
| Asian                               | 5   | 1.7  |
| Hawaiian/Pacific Islander           | 3   | 1.0  |
| Latina/Hispanic                     | 18  | 6.1  |
| American Indian/Alaskan Native      | 3   | 1.0  |
| Multiracial                         | 2   | 0.7  |
| Other                               | 5   | 1.7  |
| Prefer not to answer                | 3   | 1.0  |
| <b>Partner's race/ethnicity</b>     |     |      |
| Black/African American              | 240 | 80.8 |
| White/Caucasian                     | 35  | 11.8 |
| Asian                               | 4   | 1.3  |
| Hawaiian/Pacific Islander           | 1   | 0.3  |
| Latinx/Hispanic                     | 18  | 6.1  |
| American Indian/Alaskan Native      | 2   | 0.7  |
| Multiracial                         | 1   | 0.3  |
| Other                               | 3   | 1.0  |
| Prefer not to answer                | 2   | 0.7  |
| No partner                          | 2   | 0.7  |
| <b>Age</b>                          |     |      |
| 17-28                               | 102 | 34.3 |
| 29-32                               | 125 | 42.1 |
| 33-45                               | 70  | 23.6 |
| <b>Married</b>                      |     |      |
| Primiparous                         | 263 | 88.6 |
| <b>Time since delivery</b>          |     |      |
| <3 months                           | 103 | 34.7 |
| 3-4 months                          | 106 | 35.7 |
| 5-12 months                         | 88  | 29.6 |
| <b>Educational attainment</b>       |     |      |
| High school or less                 | 38  | 12.8 |
| Some college                        | 106 | 35.7 |
| College graduate                    | 153 | 51.5 |
| <b>Average yearly income</b>        |     |      |
| <\$50,000                           | 62  | 20.9 |
| \$50,0001-\$100,000                 | 185 | 62.3 |
| >\$100,000                          | 50  | 16.8 |
| <b>Employment status</b>            |     |      |
| Not employed                        | 104 | 35.0 |
| Employed full-time                  | 152 | 51.2 |
| Employed part-time                  | 37  | 12.5 |
| Prefer not to answer                | 4   | 1.3  |
| <b>Insurance type</b>               |     |      |
| No insurance                        | 7   | 2.4  |
| Private/employer-provided insurance | 243 | 81.8 |
| Medicaid/MediCal                    | 16  | 5.4  |
| Medicare                            | 22  | 7.4  |
| Tricare/government                  | 2   | 0.7  |
| Prefer not to answer                | 7   | 2.4  |

**Table 3: Results of exploratory factor analysis for 35-item Person-Centered Maternity Care – US scale (N=297)**

|                                   | Single factor |            | Three factor structure |      |      |            | Loading on individual sub-scales |      |      |            |
|-----------------------------------|---------------|------------|------------------------|------|------|------------|----------------------------------|------|------|------------|
|                                   | F1            | Uniqueness | F1                     | F2   | F3   | Uniqueness | CA                               | DR   | RS   | Uniqueness |
| 1. Introduction                   | 0.36          | 0.87       |                        | 0.23 |      | 0.86       | 0.36                             |      |      | 0.87       |
| 2. Felt heard                     | 0.72          | 0.49       | 0.33                   | 0.47 |      | 0.47       | 0.75                             |      |      | 0.44       |
| 3. Involved in decisions          | 0.77          | 0.41       | 0.45                   | 0.42 |      | 0.39       | 0.79                             |      |      | 0.37       |
| 4. Explain procedures             | 0.68          | 0.54       |                        | 0.59 |      | 0.47       | 0.72                             |      |      | 0.49       |
| 5. Consent                        | 0.59          | 0.66       |                        | 0.69 |      | 0.55       | 0.62                             |      |      | 0.62       |
| 6. Language understood            | 0.40          | 0.84       | 0.28                   |      |      | 0.82       | 0.48                             |      |      | 0.77       |
| 7. Felt informed                  | 0.55          | 0.70       |                        | 0.44 |      | 0.68       | 0.60                             |      |      | 0.64       |
| 8. Could ask questions            | 0.63          | 0.61       |                        | 0.42 |      | 0.57       | 0.64                             |      |      | 0.59       |
| 9. Checked understanding          | 0.71          | 0.49       | 0.57                   |      |      | 0.44       | 0.72                             |      |      | 0.48       |
| 10. Birth position of choice      | 0.53          | 0.72       | 0.44                   |      |      | 0.67       | 0.48                             |      |      | 0.77       |
| 11. Explain baby procedures       | 0.63          | 0.60       | 0.30                   | 0.41 |      | 0.58       | 0.70                             |      |      | 0.51       |
| 12. Birth preferences respected   | 0.52          | 0.73       | 0.36                   |      |      | 0.72       | 0.54                             |      |      | 0.71       |
| 13. Baby feeding choice respected | 0.58          | 0.66       |                        | 0.32 |      | 0.66       | 0.56                             |      |      | 0.69       |
| 14. Coercion                      | 0.13          | 0.98       |                        |      | 0.47 | 0.78       | 0.10                             |      |      | 0.99       |
| 15. Treated with respect          | 0.76          | 0.42       |                        | 0.63 |      | 0.38       |                                  | 0.75 |      | 0.44       |
| 16. Family respected              | 0.79          | 0.38       | 0.70                   |      |      | 0.33       |                                  | 0.80 |      | 0.36       |
| 17. Information confidential      | 0.50          | 0.75       |                        | 0.81 |      | 0.54       |                                  | 0.43 |      | 0.81       |
| 18. Privacy-covered               | 0.46          | 0.79       |                        | 0.41 |      | 0.71       |                                  | 0.44 |      | 0.80       |
| 19. Verbal abuse                  | 0.52          | 0.73       | 0.55                   |      | 0.32 | 0.60       |                                  | 0.54 |      | 0.71       |
| 20. Physical abuse                | 0.54          | 0.71       | 0.56                   |      |      | 0.66       |                                  | 0.56 |      | 0.69       |
| 21. Discrimination                | 0.74          | 0.45       | 0.74                   |      |      | 0.37       |                                  | 0.81 |      | 0.34       |
| 22. Neglected                     | 0.61          | 0.63       | 0.59                   |      | 0.35 | 0.49       |                                  | 0.62 |      | 0.61       |
| 23. Experience valued             | 0.78          | 0.39       | 0.40                   | 0.47 |      | 0.37       |                                  | 0.73 |      | 0.47       |
| 24. Customs respected             | 0.60          | 0.64       | 0.71                   |      |      | 0.53       |                                  | 0.63 |      | 0.60       |
| 25. Emotional well-being          | 0.56          | 0.69       | 0.52                   |      |      | 0.61       |                                  |      | 0.52 | 0.73       |
| 26. Pain management               | 0.45          | 0.80       |                        | 0.32 |      | 0.77       |                                  |      | 0.47 | 0.78       |
| 27. Took best care                | 0.73          | 0.46       |                        | 0.58 | 0.37 | 0.35       |                                  |      | 0.79 | 0.38       |
| 28. Trust                         | 0.73          | 0.46       |                        | 0.75 |      | 0.33       |                                  |      | 0.78 | 0.40       |
| 29. Felt safe                     | 0.58          | 0.66       |                        | 0.54 | 0.34 | 0.55       |                                  |      | 0.59 | 0.65       |
| 30. Companionship                 | 0.51          | 0.74       | 0.68                   |      |      | 0.63       |                                  |      | 0.52 | 0.73       |
| 31. Timely response               | 0.62          | 0.62       | 0.54                   |      |      | 0.58       |                                  |      | 0.65 | 0.58       |
| 32. Believed about pain           | 0.63          | 0.60       | 0.49                   |      |      | 0.58       |                                  |      | 0.66 | 0.56       |
| 33. Support for baby feeding      | 0.52          | 0.73       |                        | 0.46 |      | 0.70       |                                  |      | 0.49 | 0.76       |
| 34. Comfortable birth environment | 0.75          | 0.43       | 0.72                   |      |      | 0.38       |                                  |      | 0.73 | 0.47       |
| 35. Wait time                     | 0.50          | 0.75       | 0.35                   |      |      | 0.73       |                                  |      | 0.50 | 0.75       |

Notes: F=Factor; CA=Communication & autonomy; DR=Dignity & respect; RS=Responsive & supportive

**Table 4: Scale and sub-scale properties and distribution of scores (N=297)**

|                              | No. of items | Cronbach's alpha | Raw scores |      |      |       | Standardized score |      |      |       |
|------------------------------|--------------|------------------|------------|------|------|-------|--------------------|------|------|-------|
|                              |              |                  | Mean       | SD   | Min  | Max   | Mean               | SD   | Min  | Max   |
| Full PCMC-US scale           | 35           | 0.95             | 93.6       | 12.9 | 22.0 | 105.0 | 89.2               | 12.3 | 21.0 | 100.0 |
| Communication & autonomy     | 14           | 0.87             | 37.1       | 5.2  | 11.0 | 42.0  | 88.4               | 12.3 | 26.2 | 100.0 |
| Dignity & respect            | 10           | 0.87             | 27.7       | 3.6  | 7.0  | 30.0  | 92.4               | 12.1 | 23.3 | 100.0 |
| Responsive & supportive care | 11           | 0.87             | 28.8       | 4.8  | 4.0  | 33.0  | 87.2               | 14.6 | 12.1 | 100.0 |

**Table 5: Bivariate logistic and linear regression of scale scores on related measures to assess criterion validity (N=297)**

|                              | <i>Satisfied with care</i> |               | <i>Will birth in same place again</i> |               | <i>Rated quality of care as very good</i> |               | <i>MADM score</i> |               | <i>MORi score</i> |               |
|------------------------------|----------------------------|---------------|---------------------------------------|---------------|-------------------------------------------|---------------|-------------------|---------------|-------------------|---------------|
|                              | <i>OR</i>                  | <i>95% CI</i> | <i>OR</i>                             | <i>95% CI</i> | <i>OR</i>                                 | <i>95% CI</i> | $\beta$           | <i>95% CI</i> | $\beta$           | <i>95% CI</i> |
| Full PCMC-US scale           | 1.14***                    | [1.09 1.18]   | 1.09***                               | [1.06 1.11]   | 1.11***                                   | [1.07 1.14]   | 0.35***           | [0.32 0.39]   | 0.20***           | [0.17 0.22]   |
| Communication & autonomy     | 1.13***                    | [1.09 1.17]   | 1.08***                               | [1.05 1.11]   | 1.10***                                   | [1.07 1.13]   | 0.34***           | [0.30 0.38]   | 0.18***           | [0.15 0.21]   |
| Dignity & respect            | 1.10***                    | [1.07 1.14]   | 1.07***                               | [1.04 1.09]   | 1.10***                                   | [1.06 1.13]   | 0.33***           | [0.28 0.37]   | 0.20***           | [0.17 0.23]   |
| Responsive & supportive care | 1.13***                    | [1.09 1.17]   | 1.08***                               | [1.05 1.10]   | 1.09***                                   | [1.06 1.12]   | 0.28***           | [0.25 0.32]   | 0.16***           | [0.13 0.18]   |

Notes: \* p<0.05 \*\* p<0.01 \*\*\* p<0.001. Each row is a different bivariate model. MADM=Mothers Autonomy in Decision Making scale MORi= Mothers on Respect index. N=296 for MADM model;

**Appendix A: Distribution of Individual PCMC-US Items (N=297)**

|                                                                                                                                                                                             | No. | %    |
|---------------------------------------------------------------------------------------------------------------------------------------------------------------------------------------------|-----|------|
| How did you feel about the amount of time you had to wait before being examined by a health care provider (doctor or midwife)?                                                              |     |      |
| 0. It was just right                                                                                                                                                                        | 178 | 59.9 |
| 1. It was somewhat long                                                                                                                                                                     | 104 | 35   |
| 2. It was very long                                                                                                                                                                         | 11  | 3.7  |
| 3. It was extremely long                                                                                                                                                                    | 4   | 1.3  |
| Total                                                                                                                                                                                       | 297 | 100  |
| How did you feel about the amount of time you had to wait in triage before being seen and assessed?                                                                                         |     |      |
| 0. It was just right                                                                                                                                                                        | 205 | 69   |
| 1. It was somewhat long                                                                                                                                                                     | 68  | 22.9 |
| 2. It was very long                                                                                                                                                                         | 9   | 3    |
| 3. It was extremely long                                                                                                                                                                    | 7   | 2.4  |
| 4. Not applicable (there was no triage)                                                                                                                                                     | 8   | 2.7  |
| Total                                                                                                                                                                                       | 297 | 100  |
| Did each new provider introduce themselves to you when they first came to see you? (If you were seen by only one provider and they introduced themselves, you can select yes, all of them.) |     |      |
| 0. No, none of them                                                                                                                                                                         | 3   | 1    |
| 1. Yes, a few of them                                                                                                                                                                       | 29  | 9.8  |
| 2. Yes, most of them                                                                                                                                                                        | 77  | 25.9 |
| 3. Yes, all of them                                                                                                                                                                         | 188 | 63.3 |
| Total                                                                                                                                                                                       | 297 | 100  |
| Did your providers call you by your preferred name?                                                                                                                                         |     |      |
| 0. No, never                                                                                                                                                                                | 44  | 14.9 |
| 1. Yes, a few times                                                                                                                                                                         | 46  | 15.5 |
| 2. Yes, most of the time                                                                                                                                                                    | 78  | 26.4 |
| 3. Yes, all the time                                                                                                                                                                        | 128 | 43.2 |
| Total                                                                                                                                                                                       | 296 | 100  |
| Did your providers treat you with respect?                                                                                                                                                  |     |      |
| 0. No, never                                                                                                                                                                                | 2   | 0.7  |
| 1. Yes, a few times                                                                                                                                                                         | 13  | 4.4  |
| 2. Yes, most of the time                                                                                                                                                                    | 62  | 20.9 |
| 3. Yes, all the time                                                                                                                                                                        | 220 | 74.1 |
| Total                                                                                                                                                                                       | 297 | 100  |
| Did you feel your experience and knowledge were valued?                                                                                                                                     |     |      |
| 0. No, never                                                                                                                                                                                | 5   | 1.7  |
| 1. Yes, a few times                                                                                                                                                                         | 17  | 5.7  |
| 2. Yes, most of the time                                                                                                                                                                    | 57  | 19.2 |
| 3. Yes, all the time                                                                                                                                                                        | 218 | 73.4 |
| Total                                                                                                                                                                                       | 297 | 100  |
| Did you feel your customs and culture were respected by your providers?                                                                                                                     |     |      |
| 0. No, never                                                                                                                                                                                | 6   | 2    |
| 1. Yes, a few times                                                                                                                                                                         | 7   | 2.4  |
| 2. Yes, most of the time                                                                                                                                                                    | 14  | 4.7  |
| 3. Yes, all the time                                                                                                                                                                        | 200 | 67.3 |
| 4. I have no particular customs                                                                                                                                                             | 70  | 23.6 |
| Total                                                                                                                                                                                       | 297 | 100  |
| Did you feel heard and listened to by your providers?                                                                                                                                       |     |      |
| 0. No, never                                                                                                                                                                                | 2   | 0.7  |
| 1. Yes, a few times                                                                                                                                                                         | 25  | 8.4  |
| 2. Yes, most of the time                                                                                                                                                                    | 81  | 27.3 |
| 3. Yes, all the time                                                                                                                                                                        | 189 | 63.6 |

|                                                                                                                        |     |      |
|------------------------------------------------------------------------------------------------------------------------|-----|------|
| Total                                                                                                                  | 297 | 100  |
| Did providers knock on your rooms door and wait for response before entering?                                          |     |      |
| 0. No, never                                                                                                           | 6   | 2    |
| 1. Yes, a few times                                                                                                    | 15  | 5.1  |
| 2. Yes, most of the time                                                                                               | 35  | 11.8 |
| 3. Yes, all the time                                                                                                   | 237 | 79.8 |
| 4. Not applicable                                                                                                      | 4   | 1.3  |
| Total                                                                                                                  | 297 | 100  |
| During exams, were you covered up with a cloth or blanket or screened with a curtain so that you did not feel exposed? |     |      |
| 0 No, never                                                                                                            | 6   | 2    |
| 1 Yes, a few times                                                                                                     | 9   | 3    |
| 2 Yes, most of the time                                                                                                | 34  | 11.4 |
| 3 Yes, all the time                                                                                                    | 241 | 81.1 |
| 4 Not applicable                                                                                                       | 7   | 2.4  |
| Total                                                                                                                  | 297 | 100  |
| Did you feel your health information was kept confidential and private by providers and staff?                         |     |      |
| 1. Yes, a few times                                                                                                    | 5   | 1.7  |
| 2. Yes, most of the time                                                                                               | 67  | 22.6 |
| 3. Yes, all the time                                                                                                   | 225 | 75.8 |
| Total                                                                                                                  | 297 | 100  |
| Did your providers involve you in decisions about your care?                                                           |     |      |
| 0. No, never                                                                                                           | 1   | 0.3  |
| 1. Yes, a few times                                                                                                    | 16  | 5.4  |
| 2. Yes, most of the time                                                                                               | 46  | 15.5 |
| 3. Yes, all the time                                                                                                   | 234 | 78.8 |
| Total                                                                                                                  | 297 | 100  |
| Did your providers explain to you why they were doing examinations or procedures on you?                               |     |      |
| 0. No, never                                                                                                           | 1   | 0.3  |
| 1. Yes, a few times                                                                                                    | 10  | 3.4  |
| 2. Yes, most of the time                                                                                               | 66  | 22.2 |
| 3. Yes, all the time                                                                                                   | 220 | 74.1 |
| Total                                                                                                                  | 297 | 100  |
| Did your providers explain to you why they were doing examinations or procedures on your baby?                         |     |      |
| 0. No, never                                                                                                           | 1   | 0.3  |
| 1. Yes, a few times                                                                                                    | 8   | 2.7  |
| 2. Yes, most of the time                                                                                               | 33  | 11.1 |
| 3. Yes, all the time                                                                                                   | 242 | 81.5 |
| 4. Not applicable / I was not present to be informed                                                                   | 13  | 4.4  |
| Total                                                                                                                  | 297 | 100  |
| Did your providers explain to you why they were giving you any medicine?                                               |     |      |
| 0. No, never                                                                                                           | 10  | 3.4  |
| 1. Yes, a few times                                                                                                    | 12  | 4    |
| 2. Yes, most of the time                                                                                               | 29  | 9.8  |
| 3. Yes, all the time                                                                                                   | 74  | 24.9 |
| 4. Not applicable / I did not get any medicine                                                                         | 172 | 57.9 |
| Total                                                                                                                  | 297 | 100  |
| Did providers or other staff ask your permission/consent before touching or doing procedures on you?                   |     |      |
| 0. No, never                                                                                                           | 1   | 0.3  |
| 1. Yes, a few times                                                                                                    | 10  | 3.4  |
| 2. Yes, most of the time                                                                                               | 84  | 28.3 |



|                                                                                                                                    |     |      |
|------------------------------------------------------------------------------------------------------------------------------------|-----|------|
| 3. Yes, all the time                                                                                                               | 202 | 68   |
| Total                                                                                                                              | 297 | 100  |
| Did you feel coerced or pressured into a decision by providers?                                                                    |     |      |
| 0. No, never                                                                                                                       | 207 | 69.7 |
| 1. Yes, a few times                                                                                                                | 50  | 16.8 |
| 2. Yes, most of the time                                                                                                           | 9   | 3    |
| 3. Yes, all the time                                                                                                               | 31  | 10.4 |
| Total                                                                                                                              | 297 | 100  |
| Did you feel your birth plan or preferences were respected? (i.e. moving during labor, pain management, music, birthing position)? |     |      |
| 0. No, never                                                                                                                       | 15  | 5.1  |
| 1. Yes, a few times                                                                                                                | 13  | 4.4  |
| 2. Yes, most of the time                                                                                                           | 32  | 10.8 |
| 3. Yes, all the time                                                                                                               | 194 | 65.3 |
| 4. Not applicable                                                                                                                  | 43  | 14.5 |
| Total                                                                                                                              | 297 | 100  |
| Were you able to give birth in the position of your choice?                                                                        |     |      |
| 0. No                                                                                                                              | 15  | 5.1  |
| 1. Yes                                                                                                                             | 262 | 88.2 |
| 2. Not applicable, I had a cesarean                                                                                                | 20  | 6.7  |
| Total                                                                                                                              | 297 | 100  |
| Were you able to eat and drink if desired?                                                                                         |     |      |
| 0. No, never                                                                                                                       | 6   | 2    |
| 1. Yes, a few times                                                                                                                | 28  | 9.4  |
| 2. Yes, most of the time                                                                                                           | 31  | 10.4 |
| 3. Yes, all the time                                                                                                               | 207 | 69.7 |
| 4. It was not appropriate to eat (e.g. because of surgery)                                                                         | 25  | 8.4  |
| Total                                                                                                                              | 297 | 100  |
| Did your providers speak to you using language or words you could understand?                                                      |     |      |
| 0. No, never                                                                                                                       | 3   | 1    |
| 1. Yes, a few times                                                                                                                | 9   | 3    |
| 2. Yes, most of the time                                                                                                           | 10  | 3.4  |
| 3. Yes, all the time                                                                                                               | 275 | 92.6 |
| Total                                                                                                                              | 297 | 100  |
| Did they provide an interpreter?                                                                                                   |     |      |
| 0. No, never                                                                                                                       | 8   | 36.4 |
| 1. Yes, a few times                                                                                                                | 2   | 9.1  |
| 2. Yes, most of the time                                                                                                           | 2   | 9.1  |
| 3. Yes, all the time                                                                                                               | 3   | 13.6 |
| 4. Not applicable                                                                                                                  | 7   | 31.8 |
| Total                                                                                                                              | 22  | 100  |
| Did you feel informed about what was happening to you during your childbirth?                                                      |     |      |
| 0. No, never                                                                                                                       | 1   | 0.3  |
| 1. Yes, a few times                                                                                                                | 9   | 3    |
| 2. Yes, most of the time                                                                                                           | 79  | 26.6 |
| 3. Yes, all the time                                                                                                               | 208 | 70   |
| Total                                                                                                                              | 297 | 100  |
| Did your providers ask about your emotional well-being?                                                                            |     |      |
| 0. No, never                                                                                                                       | 23  | 7.7  |
| 1. Yes, a few times                                                                                                                | 22  | 7.4  |
| 2. Yes, most of the time                                                                                                           | 50  | 16.8 |
| 3. Yes, all the time                                                                                                               | 202 | 68   |
| Total                                                                                                                              | 297 | 100  |
| Did your providers provide you with resources to help with your emotional well-being if you needed it?                             |     |      |

|                                                                                                                            |     |      |
|----------------------------------------------------------------------------------------------------------------------------|-----|------|
| 0. No, never                                                                                                               | 13  | 4.4  |
| 1. Yes, a few times                                                                                                        | 14  | 4.7  |
| 2. Yes, most of the time                                                                                                   | 24  | 8.1  |
| 3. Yes, all the time                                                                                                       | 224 | 75.4 |
| 4. Not applicable                                                                                                          | 22  | 7.4  |
| Total                                                                                                                      | 297 | 100  |
| Did you feel you could ask your providers any questions you had?                                                           |     |      |
| 0. No, never                                                                                                               | 4   | 1.3  |
| 1. Yes, a few times                                                                                                        | 27  | 9.1  |
| 2. Yes, most of the time                                                                                                   | 83  | 27.9 |
| 3. Yes, all the time                                                                                                       | 183 | 61.6 |
| Total                                                                                                                      | 297 | 100  |
| Did providers encourage you to ask questions?                                                                              |     |      |
| 0. No, never                                                                                                               | 10  | 3.4  |
| 1. Yes, a few times                                                                                                        | 15  | 5.1  |
| 2. Yes, most of the time                                                                                                   | 63  | 21.3 |
| 3. Yes, all the time                                                                                                       | 208 | 70.3 |
| Total                                                                                                                      | 296 | 100  |
| Did providers check that you understood information that was given to you?                                                 |     |      |
| 0. No, never                                                                                                               | 5   | 1.7  |
| 1. Yes, a few times                                                                                                        | 10  | 3.4  |
| 2. Yes, most of the time                                                                                                   | 79  | 26.6 |
| 3. Yes, all the time                                                                                                       | 203 | 68.4 |
| Total                                                                                                                      | 297 | 100  |
| Did you hold back on asking questions for any reason?                                                                      |     |      |
| 0. No, never                                                                                                               | 191 | 64.3 |
| 1. Yes, a few times                                                                                                        | 71  | 23.9 |
| 2. Yes, most of the time                                                                                                   | 14  | 4.7  |
| 3. Yes, all the time                                                                                                       | 21  | 7.1  |
| Total                                                                                                                      | 297 | 100  |
| Do you feel your questions were answered when you did ask?                                                                 |     |      |
| 0. No, never                                                                                                               | 1   | 0.3  |
| 1. Yes, a few times                                                                                                        | 18  | 6.1  |
| 2. Yes, most of the time                                                                                                   | 35  | 11.8 |
| 3. Yes, all the time                                                                                                       | 241 | 81.1 |
| 4. Not applicable / I did not have any questions                                                                           | 2   | 0.7  |
| Total                                                                                                                      | 297 | 100  |
| Did providers give you information in a way that showed they cared about you?                                              |     |      |
| 0. No, never                                                                                                               | 4   | 1.4  |
| 1. Yes, a few times                                                                                                        | 18  | 6.1  |
| 2. Yes, most of the time                                                                                                   | 74  | 25   |
| 3. Yes, all the time                                                                                                       | 200 | 67.6 |
| Total                                                                                                                      | 296 | 100  |
| Did providers respect your family or companions who were with you?                                                         |     |      |
| 0. No, never                                                                                                               | 1   | 0.3  |
| 1. Yes, a few times                                                                                                        | 9   | 3    |
| 2. Yes, most of the time                                                                                                   | 24  | 8.1  |
| 3. Yes, all the time                                                                                                       | 259 | 87.2 |
| 4. Not applicable                                                                                                          | 4   | 1.3  |
| Total                                                                                                                      | 297 | 100  |
| Were you allowed to have everyone you wanted (e.g. doula, elder, friends, or family) stay with you during your childbirth? |     |      |
| 0. No, never                                                                                                               | 8   | 2.7  |
| 1. Yes, a few times                                                                                                        | 7   | 2.4  |
| 2. Yes, most of the time                                                                                                   | 36  | 12.1 |

|                                                                                                     |     |      |
|-----------------------------------------------------------------------------------------------------|-----|------|
| 3. Yes, all the time                                                                                | 244 | 82.2 |
| 4. I did not want someone to stay with me                                                           | 2   | 0.7  |
| Total                                                                                               | 297 | 100  |
| Did you feel your providers responded in a timely manner when you requested assistance?             |     |      |
| 0. No, never                                                                                        | 2   | 0.7  |
| 1. Yes, a few times                                                                                 | 14  | 4.7  |
| 2. Yes, most of the time                                                                            | 48  | 16.2 |
| 3. Yes, all the time                                                                                | 224 | 75.4 |
| 4. I did not request assistance                                                                     | 9   | 3    |
| Total                                                                                               | 297 | 100  |
| Did you feel your providers believed you when you said you were in pain?                            |     |      |
| 0. No, never                                                                                        | 7   | 2.4  |
| 1. Yes, a few times                                                                                 | 8   | 2.7  |
| 2. Yes, most of the time                                                                            | 52  | 17.5 |
| 3. Yes, all the time                                                                                | 220 | 74.1 |
| 4. Not applicable                                                                                   | 10  | 3.4  |
| Total                                                                                               | 297 | 100  |
| Do you feel your providers did everything they could to help you manage your pain?                  |     |      |
| 0. No, never                                                                                        | 16  | 5.4  |
| 1. Yes, a few times                                                                                 | 21  | 7.1  |
| 2. Yes, most of the time                                                                            | 106 | 35.7 |
| 3. Yes, all the time                                                                                | 154 | 51.9 |
| Total                                                                                               | 297 | 100  |
| Did you feel your providers avoided, ignored, or otherwise neglected you?                           |     |      |
| 0. No, never                                                                                        | 254 | 85.5 |
| 1. Yes, once                                                                                        | 21  | 7.1  |
| 2. Yes, a few times                                                                                 | 20  | 6.7  |
| 3. Yes, many times                                                                                  | 2   | 0.7  |
| Total                                                                                               | 297 | 100  |
| Did you feel your providers shouted at you, scolded, insulted, threatened, or talked to you rudely? |     |      |
| 0. No, never                                                                                        | 280 | 94.3 |
| 1. Yes, once                                                                                        | 8   | 2.7  |
| 2. Yes, a few times                                                                                 | 7   | 2.4  |
| 3. Yes, many times                                                                                  | 2   | 0.7  |
| Total                                                                                               | 297 | 100  |
| Did you feel like your providers handled you roughly, held you down, or physically restrained you?  |     |      |
| 0. No, never                                                                                        | 273 | 91.9 |
| 1. Yes, once                                                                                        | 11  | 3.7  |
| 2. Yes, a few times                                                                                 | 9   | 3    |
| 3. Yes, many times                                                                                  | 4   | 1.3  |
| Total                                                                                               | 297 | 100  |
| Did you feel your providers took the best care of you?                                              |     |      |
| 0. No, never                                                                                        | 12  | 4    |
| 1. Yes, a few times                                                                                 | 13  | 4.4  |
| 2. Yes, most of the time                                                                            | 70  | 23.6 |
| 3. Yes, all the time                                                                                | 202 | 68   |
| Total                                                                                               | 297 | 100  |
| Did you feel you could completely trust your providers with regards to your care?                   |     |      |
| 0. No, never                                                                                        | 8   | 2.7  |
| 1. Yes, a few times                                                                                 | 16  | 5.4  |
| 2. Yes, most of the time                                                                            | 76  | 25.6 |

|                                                                                                                                                                                                                                                                   |     |      |
|-------------------------------------------------------------------------------------------------------------------------------------------------------------------------------------------------------------------------------------------------------------------|-----|------|
| 3. Yes, all the time                                                                                                                                                                                                                                              | 197 | 66.3 |
| Total                                                                                                                                                                                                                                                             | 297 | 100  |
| Would you say you were discriminated against because of your race, ethnicity, culture, sex, gender, sexual orientation, language, immigration status, religion, income, education, age, marital status, number of children, insurance status, or other attribute? |     |      |
| 0. No, never                                                                                                                                                                                                                                                      | 280 | 94.3 |
| 1. Yes, a few times                                                                                                                                                                                                                                               | 10  | 3.4  |
| 2. Yes, most of the time                                                                                                                                                                                                                                          | 6   | 2    |
| 3. Yes, all the time                                                                                                                                                                                                                                              | 1   | 0.3  |
| Total                                                                                                                                                                                                                                                             | 297 | 100  |
| Were you separated from your baby at any time after the birth?                                                                                                                                                                                                    |     |      |
| 0. No                                                                                                                                                                                                                                                             | 261 | 87.9 |
| 1. Yes                                                                                                                                                                                                                                                            | 35  | 11.8 |
| 2. Not sure/don't remember                                                                                                                                                                                                                                        | 1   | 0.3  |
| Total                                                                                                                                                                                                                                                             | 297 | 100  |
| If you were separated from your baby, was it communicated to you as to why?                                                                                                                                                                                       |     |      |
| 0. No                                                                                                                                                                                                                                                             | 6   | 17.6 |
| 1. Yes                                                                                                                                                                                                                                                            | 28  | 82.4 |
| Total                                                                                                                                                                                                                                                             | 34  | 100  |
| Was your feeding choice for your baby (breastfeeding, bottle feeding, both) respected by your providers?                                                                                                                                                          |     |      |
| 0. No, never                                                                                                                                                                                                                                                      | 1   | 0.3  |
| 1. Yes, a few times                                                                                                                                                                                                                                               | 10  | 3.4  |
| 2. Yes, most of the time                                                                                                                                                                                                                                          | 27  | 9.1  |
| 3. Yes, all the time                                                                                                                                                                                                                                              | 255 | 85.9 |
| 4. Not applicable                                                                                                                                                                                                                                                 | 4   | 1.3  |
| Total                                                                                                                                                                                                                                                             | 297 | 100  |
| Did you receive the support you needed to reach your baby's feeding goals? (i.e. Lactation support)?                                                                                                                                                              |     |      |
| 0. No, never                                                                                                                                                                                                                                                      | 5   | 1.7  |
| 1. Yes, a few times                                                                                                                                                                                                                                               | 14  | 4.7  |
| 2. Yes, most of the time                                                                                                                                                                                                                                          | 34  | 11.4 |
| 3. Yes, all the time                                                                                                                                                                                                                                              | 243 | 81.8 |
| 4. Not applicable                                                                                                                                                                                                                                                 | 1   | 0.3  |
| Total                                                                                                                                                                                                                                                             | 297 | 100  |
| Were you supported in creating a birth environment that made you feel comfortable?                                                                                                                                                                                |     |      |
| 0. No, never                                                                                                                                                                                                                                                      | 3   | 1    |
| 1. Yes, a few times                                                                                                                                                                                                                                               | 16  | 5.4  |
| 2. Yes, most of the time                                                                                                                                                                                                                                          | 21  | 7.1  |
| 3. Yes, all the time                                                                                                                                                                                                                                              | 252 | 84.8 |
| 4. Not applicable                                                                                                                                                                                                                                                 | 5   | 1.7  |
| Total                                                                                                                                                                                                                                                             | 297 | 100  |
| Thinking about the place where you gave birth, did you feel that the rooms and facilities were clean?                                                                                                                                                             |     |      |
| 0. No, never                                                                                                                                                                                                                                                      | 1   | 0.3  |
| 1. Yes, a few times                                                                                                                                                                                                                                               | 5   | 1.7  |
| 2. Yes, most of the time                                                                                                                                                                                                                                          | 39  | 13.1 |
| 3. Yes, all the time                                                                                                                                                                                                                                              | 251 | 84.5 |
| 4. Not applicable                                                                                                                                                                                                                                                 | 1   | 0.3  |
| Total                                                                                                                                                                                                                                                             | 297 | 100  |
| Did you feel the place you gave birth was crowded during your birth stay? (i.e. not enough beds, moved from room to room, being in triage a long time)?                                                                                                           |     |      |
| 0. No, never                                                                                                                                                                                                                                                      | 214 | 72.1 |

|                                                                            |     |      |
|----------------------------------------------------------------------------|-----|------|
| 1. Yes, a few times                                                        | 39  | 13.1 |
| 2. Yes, most of the time                                                   | 20  | 6.7  |
| 3. Yes, all the time                                                       | 23  | 7.7  |
| 4. Not applicable                                                          | 1   | 0.3  |
| Total                                                                      | 297 | 100  |
| Did you feel you had access to your preferred place of birth?              |     |      |
| 0. No                                                                      | 14  | 4.8  |
| 1. Yes                                                                     | 279 | 95.2 |
| Total                                                                      | 293 | 100  |
| Do you think the place you gave birth met your needs?                      |     |      |
| 0. No, never                                                               | 6   | 2    |
| 1. Yes, a few times                                                        | 14  | 4.7  |
| 2. Yes, most of the time                                                   | 75  | 25.3 |
| 3. Yes, all the time                                                       | 201 | 67.9 |
| Total                                                                      | 296 | 100  |
| In general, did you feel physically safe in or around your place of birth? |     |      |
| 0. No, never                                                               | 2   | 0.7  |
| 1. Yes, a few times                                                        | 6   | 2    |
| 2. Yes, most of the time                                                   | 60  | 20.2 |
| 3. Yes, all the time                                                       | 229 | 77.1 |
| Total                                                                      | 297 | 100  |

---

**Appendix B: Results from Survey to Prioritize Items (N=14)**

| No                                | Domain/Item                                                                                                                                                                                                                                                       | N  | Notes                                     |
|-----------------------------------|-------------------------------------------------------------------------------------------------------------------------------------------------------------------------------------------------------------------------------------------------------------------|----|-------------------------------------------|
| <b>Communication and Autonomy</b> |                                                                                                                                                                                                                                                                   |    |                                           |
| 1                                 | Did providers or other staff ask your permission/consent before touching or doing procedures or examinations on you?                                                                                                                                              | 14 | High loading, High priority: retained     |
| 2                                 | Did your providers explain to you why they were doing examinations or procedures on you?                                                                                                                                                                          | 12 | High loading, High priority: retained     |
| 3                                 | Did your providers explain to you why they were doing examinations or procedures on your baby?                                                                                                                                                                    | 10 | High loading, High priority: retained     |
| 4                                 | Did your providers involve you in decisions about your care?                                                                                                                                                                                                      | 10 | High loading, High priority: retained     |
| 5                                 | Did you feel informed about what was happening to you during your childbirth?                                                                                                                                                                                     | 10 | High loading, High priority: retained     |
| 6                                 | Did you feel coerced or pressured into a decision by providers?                                                                                                                                                                                                   | 9  | High loading, High priority: retained     |
| 7                                 | Did you feel you could ask your providers any questions you had?                                                                                                                                                                                                  | 8  | High loading, High priority: retained     |
| 8                                 | Did you feel heard and listened to by your providers?                                                                                                                                                                                                             | 7  | High loading, High priority: retained     |
| 9                                 | Did your providers speak to you using language or words you could understand?                                                                                                                                                                                     | 7  | High loading, High priority: retained     |
| 10                                | Did each new provider introduce themselves to you when they first came to see you?                                                                                                                                                                                | 6  | High loading, Moderate priority: retained |
| 11                                | Did providers check that you understood information that was given to you?                                                                                                                                                                                        | 6  | High loading, Moderate priority: retained |
| 12                                | Was your feeding choice for your baby (breastfeeding, bottle) respected by providers?                                                                                                                                                                             | 6  | High loading, Moderate priority: retained |
| 13                                | Did your providers call you by your preferred name?                                                                                                                                                                                                               | 5  | Low loading, Moderate priority: removed   |
| 14                                | Did you feel your birth plan or preferences were respected? (i.e. moving during labor, pain management, music, birthing position)                                                                                                                                 | 5  | High loading, Moderate priority: retained |
| 15                                | Were you able to give birth in the position of your choice?                                                                                                                                                                                                       | 5  | High loading, Moderate priority: retained |
| 16                                | Did your providers explain to you why they were giving medicine?                                                                                                                                                                                                  | 4  | Low priority: removed                     |
| 17                                | Did you hold back on asking questions for any reason?                                                                                                                                                                                                             | 3  | Low priority: removed                     |
| 18                                | Did providers encourage you to ask questions?                                                                                                                                                                                                                     | 3  | Low priority: removed                     |
| 19                                | Do you feel your questions were answered when you did ask?                                                                                                                                                                                                        | 2  | Low priority: removed                     |
| <b>Dignity and Respect</b>        |                                                                                                                                                                                                                                                                   |    |                                           |
| 1                                 | Did your providers treat you with respect?                                                                                                                                                                                                                        | 14 | High loading, High priority: retained     |
| 2                                 | Did providers respect your family or companions who were with you?                                                                                                                                                                                                | 14 | High loading, High priority: retained     |
| 3                                 | Did you feel your providers shouted at you, scolded, insulted, threatened, or talked to you rudely?                                                                                                                                                               | 13 | High loading, High priority: retained     |
| 4                                 | Would you say you were discriminated against because of your race, ethnicity, culture, sex, gender, sexual orientation, language, immigration status, religion, income, education, age, marital status, number of children, insurance status, or other attribute? | 13 | High loading, High priority: retained     |
| 5                                 | Did you feel your providers avoided, ignored, or otherwise neglected you?                                                                                                                                                                                         | 12 | High loading, High priority: retained     |
| 6                                 | Did you feel your customs and culture were respected by your providers?                                                                                                                                                                                           | 11 | High loading, High priority: retained     |
| 7                                 | During exams, were you covered up with a cloth or blanket or screened with a curtain so that you did not feel exposed?                                                                                                                                            | 11 | High loading, High priority: retained     |
| 8                                 | Did you feel like your providers handled you roughly, held you down, or physically restrained you?                                                                                                                                                                | 8  | High loading, High priority: retained     |

|                                       |                                                                                                                                                         |    |                                           |
|---------------------------------------|---------------------------------------------------------------------------------------------------------------------------------------------------------|----|-------------------------------------------|
| 9                                     | Did you feel your experience and knowledge were valued?                                                                                                 | 7  | High loading, High priority: retained     |
| 10                                    | Did you feel your health information was kept confidential and private by providers?                                                                    | 5  | High loading, moderate priority: retained |
| 11                                    | Did providers knock on your rooms door and wait for response before entering?                                                                           | 3  | Low priority: removed                     |
| <b>Responsive and Supportive Care</b> |                                                                                                                                                         |    |                                           |
| 1                                     | Did you feel you could completely trust your providers with regards to your care?                                                                       | 12 | High loading, High priority: retained     |
| 2                                     | Did you feel your providers responded in a timely manner when you requested assistance?                                                                 | 11 | High loading, High priority: retained     |
| 3                                     | Were you allowed to have everyone you wanted (e.g. doula, elder, friends, or family) stay with you during your childbirth?                              | 11 | High loading, High priority: retained     |
| 4                                     | Did your providers ask about your emotional well-being?                                                                                                 | 11 | High loading, High priority: retained     |
| 5                                     | Do you feel your providers did everything they could to help you manage your pain?                                                                      | 10 | High loading, High priority: retained     |
| 6                                     | In general, did you feel physically safe in or around your place of birth?                                                                              | 10 | High loading, High priority: retained     |
| 7                                     | Did you feel your providers believed you when you said you were in pain?                                                                                | 9  | High loading, High priority: retained     |
| 8                                     | Did you receive the support you needed to reach feeding goals? (i.e. Lactation support)                                                                 | 8  | High loading, High priority: retained     |
| 9                                     | Were you supported in creating a birth environment that made you feel comfortable?                                                                      | 8  | High loading, High priority: retained     |
| 10                                    | How did you feel about the amount of time you had to wait before being examined by a health care provider (doctor or midwife)?                          | 7  | High loading, High priority: retained     |
| 11                                    | Did you feel your providers took the best care of you?                                                                                                  | 5  | High loading, Moderate priority: retained |
| 12                                    | Were you separated from your baby at any time after time after the birth?                                                                               | 5  | Low loading, Moderate priority: removed   |
| 13                                    | How did you feel about the time you waited in triage before being seen and assessed?                                                                    | 4  | Low priority: removed                     |
| 14                                    | Did providers give you information in a way that showed they cared about you?                                                                           | 4  | Low priority: removed                     |
| 15                                    | Thinking about the place where you gave birth, did you feel that the rooms and facilities were clean?                                                   | 4  | Low priority: removed                     |
| 16                                    | Did you feel the place you gave birth was crowded during your birth stay? (i.e., not enough beds, moved from room to room, being in triage a long time) | 4  | Low priority: removed                     |
| 17                                    | Did your providers provide you with resources to help with your emotional well-being if you needed it?                                                  | 3  | Low priority: removed                     |
| 18                                    | Do you think the place you gave birth met your needs?                                                                                                   | 3  | Low priority: removed                     |
| 19                                    | Were you able to eat and drink if desired?                                                                                                              | 2  | Low priority: removed                     |
| 20                                    | Did you feel you had access to your preferred place of birth?                                                                                           | 2  | Low priority: removed                     |

Notes: Considered high priority if selected by at least half of respondents (N>7) and low priority if selected by a third of respondents (<5).
